## Air Embolism Associated with Pulmonary Artery Catheter Introducer Kit

D. D. DOBLAR, PH.D., M.D.,\* JOHN C. HINKLE, M.S., M.D.,† MARSHALL L. FAY, M.D.,\*  
BRIAN F. CONDON, M.D.‡

Catheter introducer kits provided with self-sealing or valved pulmonary artery catheter introducer ports have become commercially available to reduce the risk of air entry into the circulation during insertion of the pulmonary artery catheter and after its removal. There are also catheter introducer kits which have ports that are not self-sealing. The use of a catheter introducer kit which does not provide the self-sealing introducer port resulted in two potentially fatal episodes of air embolism in patients during the postoperative period.

## REPORT OF TWO CASES

*Patient 1.* A 53-year-old man was admitted for hemiglossectomy for recurrence of a squamous cell carcinoma of the tongue and floor of the mouth. His medical history included myocardial infarctions two and three years preoperatively, a long history of angina pectoris, hypertension, chronic alcohol abuse, and an 80 pack-year history of cigarette smoking. In the operating room, a radial arterial catheter and a right internal jugular catheter introducer (Arrow International®, 7-French Catheter/Sheath Adapter with Side Port, #AK-06800) were inserted percutaneously. A pulmonary artery catheter was inserted through the catheter introducer and the induction of anesthesia proceeded. Surgery was uneventful with pulmonary arterial, central venous, and arterial pressures remaining in the normal ranges throughout the course of the procedure. The trachea was extubated in the Surgical Intensive Care Unit. After several hours of observation, the pulmonary artery catheter was removed from the catheter introducer by a physician who had not been present during the insertion of the catheter introducer. The indwelling introducer site was redressed and the side port utilized for intravenous fluid administration. The patient subsequently was changed to the head-elevated position by one of the Intensive Care Unit staff.

\* Resident in Anesthesiology, Walter Reed Army Medical Center, Washington, DC.

† Staff Anesthesiologist, Eisenhower Army Medical Center, Augusta, Georgia.

‡ Staff Anesthesiologist, Walter Reed Army Medical Center, Washington, DC. Assistant Professor of Anesthesiology, The Uniformed Services University of the Health Sciences, Bethesda, Maryland.

Received from the Department of Anesthesiology, Uniformed Services University of the Health Sciences, Bethesda, Maryland, and the Anesthesia and Operative Service, Walter Reed Army Medical Center, Washington, DC. Accepted for publication September 23, 1981.

The opinions or assertions contained herein are the private views of the authors and are not to be construed as reflecting the views of the Department of the Army or the Department of Defense.

Address reprint requests to Dr. D. D. Doblal; Department of Anesthesiology, Uniformed Services University of the Health Sciences, 4301 Jones Bridge Rd., Bethesda, Maryland 20014.

Key words: Equipment: percutaneous catheter introducers; catheters, flow-directed, pulmonary artery. Embolism: air.

A few minutes after the patient resumed the head-elevated position, he was noted to be tachypneic, tachycardic, and appeared dusky. Significant ECG changes were noted on the monitor in the form of ST-segment depression and premature ventricular beats. Blood pressure decreased from 130/75 to 100/60 mmHg within one minute. Auscultation of the heart revealed a "mill-wheel" murmur characteristic of venous air embolism. While the patient was being placed in the left lateral decubitus position, the catheter introducer was removed since it was the likely source of air entry into the circulation, but the exact location of the leak in the introducer was not immediately apparent. There was a transient episode of bradycardia which apparently responded to the change in position. While breathing room air, the  $pH_a$  was 7.38,  $Pa_{CO_2}$  45 mmHg, and  $Pa_{O_2}$  37 mmHg. With an approximate  $FI_{O_2}$  of 0.5 to 0.6 delivered by mask,  $pH_a$  was 7.34,  $Pa_{CO_2}$  43 mmHg, and  $Pa_{O_2}$  90 mmHg ten minutes later. The patient recovered with no lasting complications.

*Patient 2.* A 64-year-old man was admitted for left profundoplasty for severe claudication secondary to thrombosis of a previous aorto-femoral bypass. His medical history was remarkable for myocardial infarction eight years preoperatively, angina pectoris, hypertension, and diabetes mellitus. After being transported to the operating room, a radial arterial catheter and a right internal jugular catheter introducer (Arrow International®, 7-French Catheter/Sheath Adapter with Side Port, #AK-06800) were inserted percutaneously. The introducer was placed to permit the insertion of a pulmonary artery catheter intra-operatively since the change to a more extensive surgical procedure was likely. A 16-gauge, tapered, 30-cm central venous catheter which seals in the pulmonary artery port of the introducer (Argyle®, Intramedicut) was inserted through the catheter introducer and the induction of anesthesia proceeded. The operative procedure was uneventful, the trachea was extubated, and the patient was taken to the Intensive Care Unit for observation.

After several hours in the Intensive Care Unit, the patient pulled the central venous catheter out of the catheter introducer. The patient was noted by the nurse to be disoriented and tachypneic. The only ECG change noted was an increase in heart rate from 95 to 125 beats/min. Blood pressure was unchanged. The patient was placed in the left lateral decubitus position and several ml of air were recovered from a central venous catheter passed through the introducer. Auscultation of the heart did not reveal a "mill-wheel" murmur. With an  $FI_{O_2}$  of 0.4, the  $pH_a$  was 7.42,  $Pa_{CO_2}$  38 mmHg, and the  $Pa_{O_2}$  56 mmHg. Six hours later the  $pH_a$  was 7.43,  $Pa_{CO_2}$  39 mmHg, and the  $Pa_{O_2}$  118 mmHg. The patient had no further difficulty related to the air embolus.

## DISCUSSION

Venous air embolism is a well-recognized complication of invasive monitoring of the right side of the heart.<sup>1</sup> In these cases all the standard precautions were taken to prevent air embolism but a peculiarity of one of the several catheter introducer kits used in our institution resulted in nearly fatal accidents in patients who had undergone successful anesthetic and surgical procedures.

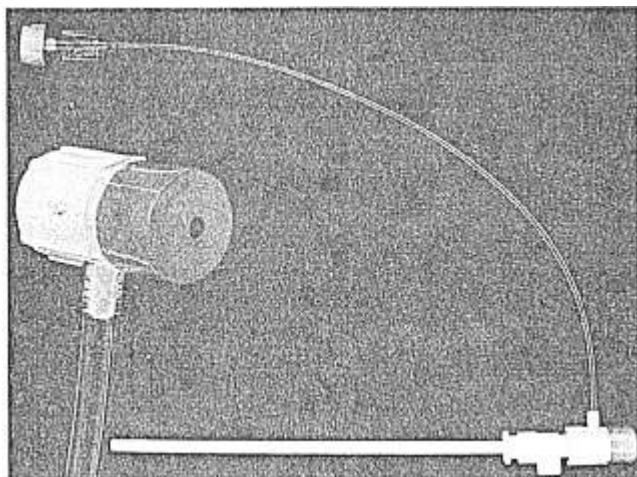

FIG. 1. Two views of the Arrow International®, 7-French Catheter/Sheath Adapter with Side Port, #AK-06800 demonstrating the 7-French hole which is the site of entry of air in the two cases discussed. This port for the insertion of a central venous catheter or a pulmonary arterial catheter is not self-sealing.

The complication in the first case occurred as a result of a common practice of removing the pulmonary arterial catheter from the catheter introducer and using the side arm of the introducer as a central venous access port for drug administration. The catheter introducer kit used in these two cases has no practical provision for self-sealing of the pulmonary arterial catheter introducer site after the removal of the pulmonary arterial catheter and is easily confused with other types of introducers which have self-sealing valves. A 7-French plug is included in the sterile package which is intended for use as an obturator to prevent air entry if a pulmonary arterial catheter is not inserted into the port. The risk of air entry is stated clearly in the package insert. However, if a catheter is inserted, the plug is discarded since no provision is made for maintaining it sterile. Once the pulmonary arterial catheter is removed (frequently by personnel in the Intensive Care Unit not involved with the choice of the introducer and who have not seen the warning on the package insert) a hole at least 7-French in diameter remains (fig. 1). In the first case, this fact was not known by the physician who removed the pulmonary artery catheter and replaced the dressing. This physician confused the introducer with a self-sealing type frequently used in our hospital (Cordis®). By allowing the patient to sit after the removal of the catheter, air entry occurred through the hole resulting in a serious postoperative complication.

The risk of air entry and the safe use of the Arrow® introducer were discussed with the housestaff and nurses. Several days later, despite increased awareness of the risk, an air embolism occurred in the second patient.

This time, however, the patient himself removed the catheter from the introducer port.

Large volumes of air may enter the circulation if the port is left open. Conahan<sup>1</sup> has measured the relationship between pressure gradient and air flow through the 7-French introducer and clearly demonstrated that a 4-mmHg gradient is sufficient to produce a fatal air embolism in an adult. With a smaller gradient and slow infusion Adornato *et al.*<sup>2</sup> has demonstrated that a gasp is evoked resulting in an increase in the pressure gradient across the catheter which may result in a bolus of air entry into the circulation, air lock, and death. English *et al.*<sup>3</sup> have shown that the changes in the ECG, arterial blood gases, blood pressure, the presence of the "mill-wheel" murmur, and arrhythmia are all late intermediate or late changes seen only with 1 to 2 ml/kg of air entry into the heart suggesting that our first patient probably entrained 75 to 150 ml of air through the introducer. The large intrapulmonary shunt, hypoxia, hypotension, and ECG changes observed in the first case also suggest a significant volume of air entry. In the second patient, the increase in intrapulmonary shunt which resolved after several hours and air recovery from the central catheter suggests that a significant air leak was present. The treatment of this complication is well-described by Alvaran *et al.*<sup>4</sup>

Because of these unfortunate experiences with this particular catheter introducer, we encourage the use of only self-sealing catheter introducers for patients who are to be attended by several different medical teams and have warned the medical and nursing staff in other Intensive Care areas of the potential danger and easy confusion of the introducers which are self-sealing with those that require obturators or manual closure of the port. The problem with the Arrow® #AK-06800 kit may be short-lived since the manufacturer is developing a new introducer valve.

There are, however, several other types of catheter introducers available with valves which fall into three general categories: 1) not self-sealing, 2) self-sealing, and 3) adjustable orifice, not self-sealing (Tuohy-Borst®). Many are available with and without side arm ports. The Arrow® #AK-06800, Stanco®, Argon® PAC TRAY/2, Argon® PAC KIT/2, and all introducers without side arm ports (UMI®, for example) are not self-sealing. The Cordis® #501-638 Kit, all USCI® introducers with side ports, Argon® PAC TRAY/1, Argon® PAC KIT/1, and Argon® PCI KIT/4 have self-sealing valves. The Argon® PAC TRAY/3 and PAC KIT/3 contain the Tuohy-Borst® type valve mechanism which must be closed manually after the removal of the catheter.

Because supplies of catheter introducer kits which do not have self-sealing ports probably exist in many hospitals, and because the pulmonary artery catheter intro-

ducer valves are interchangeable on many introducers, we suggest that users of catheter introducer kits carefully examine the introducer ports and to use caution with those that are not self-sealing.

#### REFERENCES

1. Conahan TJ III: Air embolization during percutaneous Swan-Ganz catheter placement. *ANESTHESIOLOGY* 50:360-361, 1979
2. Adornato DC, Gildenberg PL, Ferrario CM, et al: Pathophysiology of intravenous air embolism in dogs. *ANESTHESIOLOGY* 49:120-127, 1978
3. English JB, Westenskow D, Hodges MR, et al: Comparison of venous air embolism monitoring methods in supine dogs. *ANESTHESIOLOGY* 48:425-429, 1978
4. Alvaran SB, Touns JK, Graff TE, et al: Venous air embolism: comparative merits of external cardiac massage, intracardiac aspiration, and left lateral decubitus position. *Anesth Analg (Cleve)* 57:166-170, 1978

Anesthesiology  
56:309-310, 1982

## Use of a Stabilized, Armored Endotracheal Tube in Maxillofacial Surgery

HERMANN L. BECKERS, M.D., D.D.S.\*

The use of flexometallic (armored) endotracheal tubes is well established in anesthesia. Sanders<sup>1</sup> described the advantages of the armored tube for anesthesia in patients with facial deformities, fractures, or wounds. The close relationship of the surgical field to the endotracheal tube in maxillofacial surgery presents several problems. Fixation of the tube close to the nasal or oral ostium with tape may interfere with disinfection of the surgical site. The disinfecting solutions may loosen the tape. The flexometallic tube secured by tape maintains tension which may distort the facial soft tissues. Thereby, judgment of the facial profile or contours during surgery may be impaired. A connector at the end of the tube, usually well above the oral nasal level, may impair proper access to the surgical field. Lastly, during orotracheal intubation the tube may interfere with the evaluation of a planned occlusion. The inherent flexibility of the tube causes it inevitably to curve back between upper and lower teeth when pushed laterally into the vestibulum. A stabilized armored tube was devised which may solve some of the above problems.

The extraoral or extranasal part of the tube can be molded easily to the facial contour. The lumen is non-collapsible and maintains its shape even when sharply bent to an extreme degree, such as around the nasal tip. Lastly, this tube allows positioning of extending connectors outside the maxillo-facial region.

A commonly used flexometallic tube (Silkolatex by Rüsch†) has been lengthened for another 10 cm. Thereby, the extraoral or extranasal part of the tube reaches the

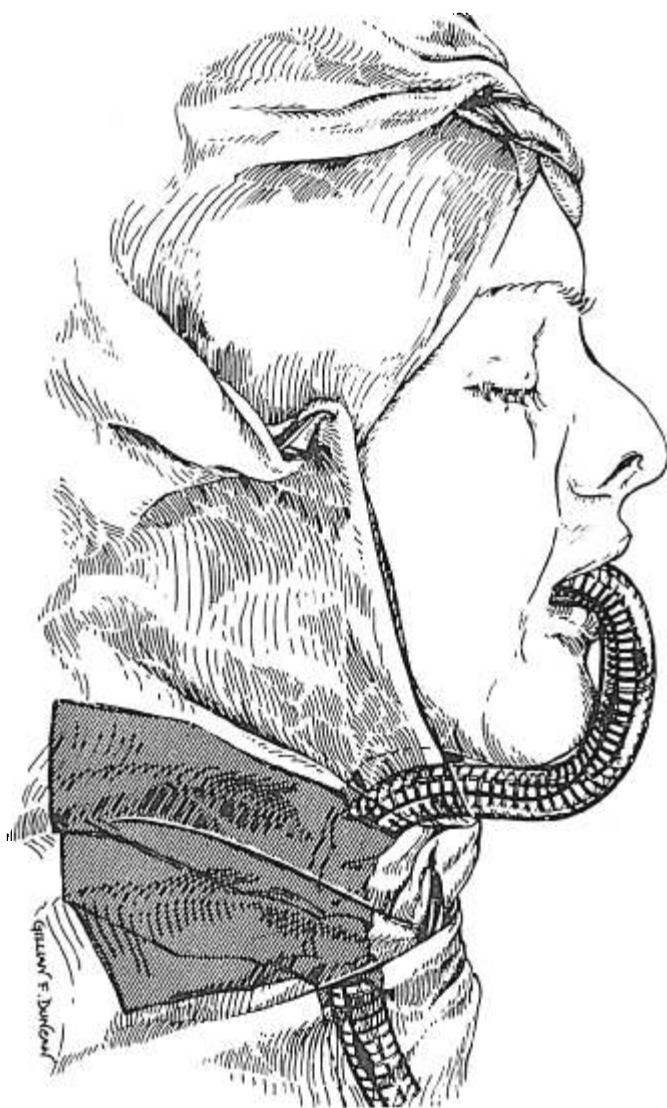

FIG. 1. In orotracheal intubation, the increased length of the tube permits normal tape fixation outside the operating field in the neck-region. Due to the contour-retaining characteristics of the tube unhindered evaluation of the soft tissue profile is possible.

\* Assistant Chief.

† Rüsch Corp., 7050 Waiblingen, West Germany.

Received from the Department of Oral and Maxillo-Facial Surgery, University Hospital, Homburg/Saar, West Germany. Accepted for publication September 23, 1981.

Address reprint requests to Dr. Beckers.

Key words: Equipment: tubes, endotracheal, armored; Surgery: maxillofacial.
